# Supplementary material for: Multiplex CRISPR/Cas9 genome editing in hematopoietic stem cells for fetal hemoglobin reinduction generates chromosomal translocations
Source: PubMed Central journal article supplement — Mol Ther Methods Clin Dev. 2021 Oct 28;23:507–23. doi: 10.1016/j.omtm.2021.10.008 (PMC8605315; doi:10.1016/j.omtm.2021.10.008), 2021-10-28
Supplement: mmc1.pdf [file mmc1.pdf]

**OMTM, Volume 23**

**Supplemental information**

**Multiplex CRISPR/Cas9 genome editing in  
hematopoietic stem cells for fetal hemoglobin  
reinduction generates chromosomal translocations**

**Clare Samuelson, Stefan Radtke, Haiying Zhu, Mallory Llewellyn, Emily Fields, Savannah Cook, Meei-Li W. Huang, Keith R. Jerome, Hans-Peter Kiem, and Olivier Humbert**

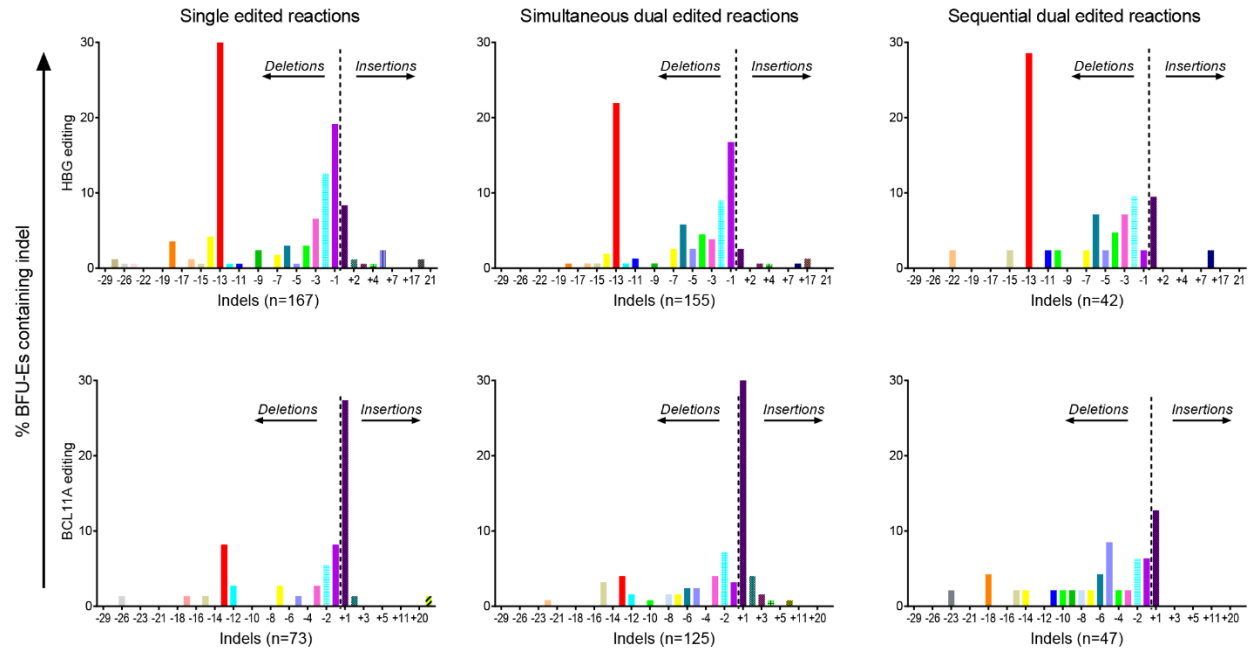

**Supplementary Figure S1. Indel patterns in individual BFU-Es following single or dual**

**CRISPR/Cas9 editing.** Indel patterns observed at HBG-113 and BCL11A-ee within individual BFU-Es

were analyzed, following single, simultaneous dual or sequential dual editing reactions. A reduction in larger indels was observed with simultaneous dual editing, particularly at the HBG-113 locus, consistent with saturation of the MMEJ repair pathway. *Abbreviations:* BCL11A: BCL11A-ee; HBG: HBG-113.

**BCL11A-ee**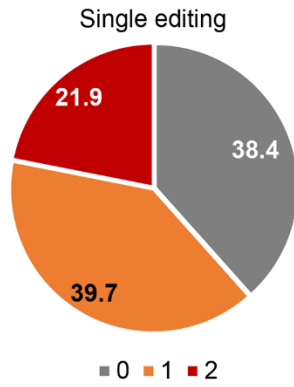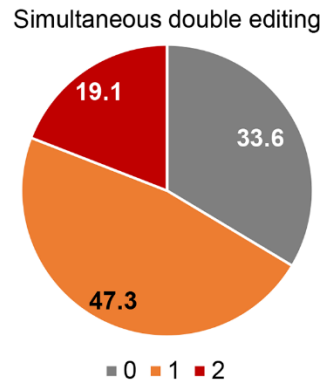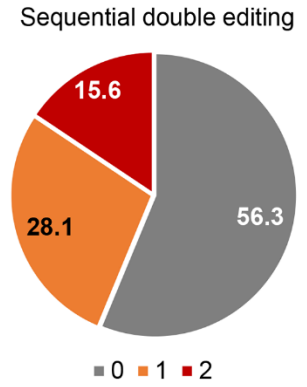**HBG-113**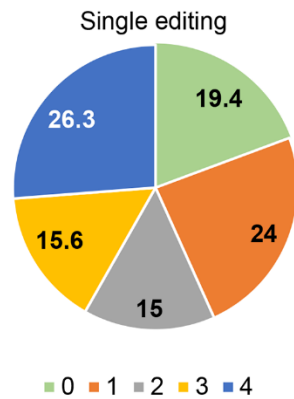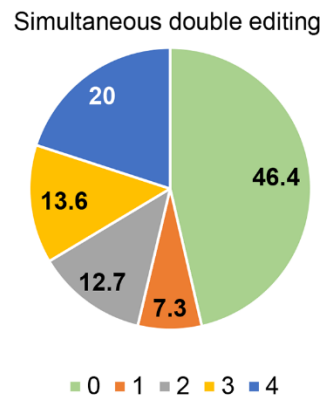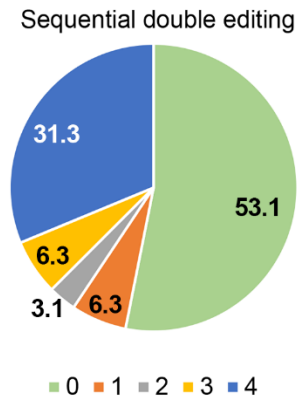

**Supplementary Figure S2. Distribution of allele numbers edited in each reaction at each locus, on analysis of single BFU-Es (%)**

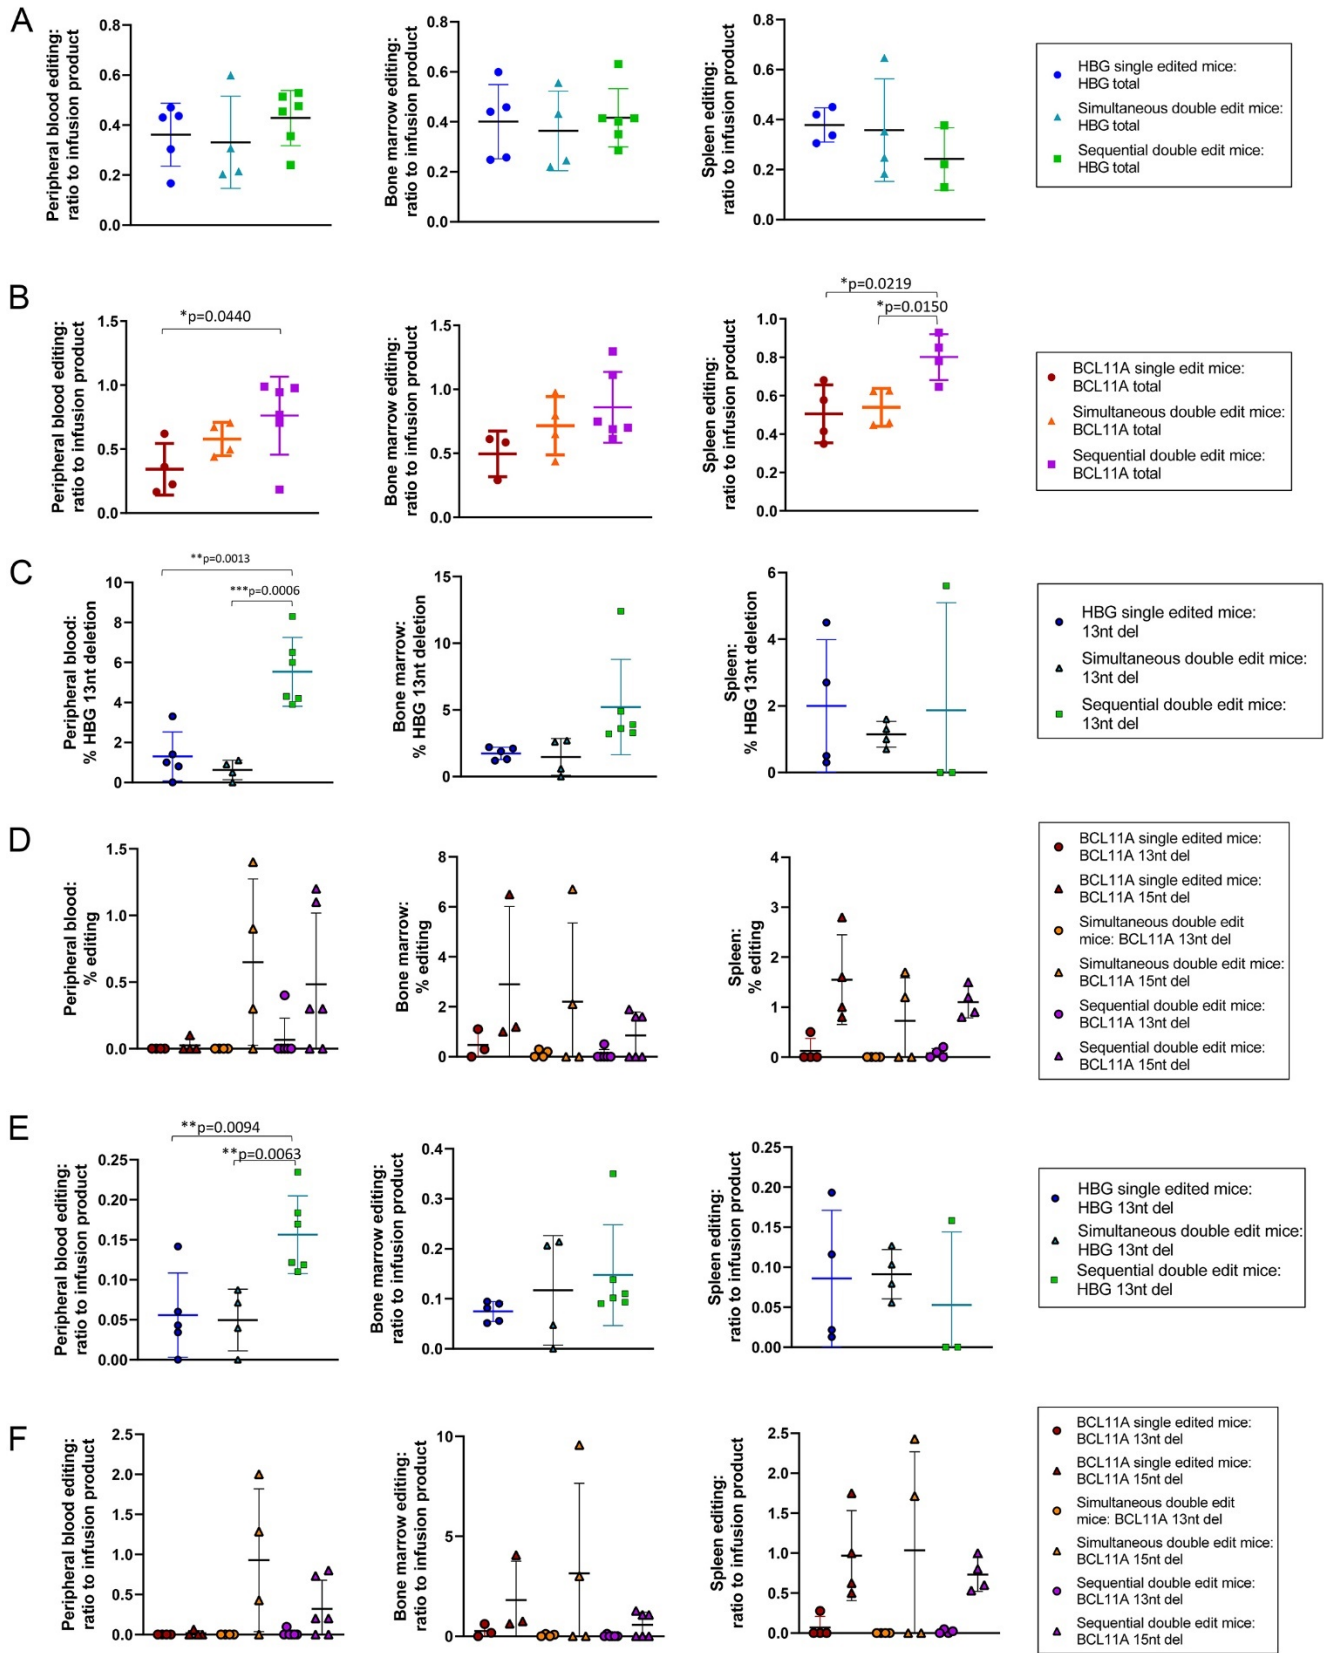

**Supplementary Figure S3. Editing in humanized mouse tissues following transplantation with single or dual-edited CD34<sup>+</sup> cells.**

**(A)** HBG-113 total editing within human cells in the PB, BM and spleen at necropsy: ratio to editing frequency within infusion product for each arm (mean  $\pm$ SD). **(B)** BCL11A-ee total editing within human cells in the PB, BM and spleen at necropsy: ratio to editing frequency within infusion product for each arm (mean  $\pm$ SD). **(C)** HBG-113 13-nt deletion frequencies within human cells in the PB, BM and spleen at necropsy (mean  $\pm$ SD). **(D)** BCL11A-ee 13- and 15-nt deletion frequencies within human cells in the PB, BM and spleen at necropsy (mean  $\pm$ SD). **(E)** HBG-113 13-nucleotide deletion frequencies within human cells in the PB, BM and spleen at necropsy: ratio to editing frequency within infusion product for each arm (mean  $\pm$ SD). **(F)** BCL11A-ee 13- and 15-nt deletion frequencies within human cells in the PB, BM and spleen at necropsy: ratio to editing frequency within infusion product for each arm (mean  $\pm$ SD).

*Abbreviations:* BCL11A: BCL11A-ee; HBG: HBG-113; nt: nucleotide.
